# Supplementary material for: Spatial patterns of climate change across the Paleocene–Eocene Thermal Maximum
Source: PubMed Central journal article supplement — Proc Natl Acad Sci U S A. 2022 Oct 10;119(42):e2205326119. doi: 10.1073/pnas.2205326119 (PMC9586325; doi:10.1073/pnas.2205326119), 2022-10-10
Supplement: pnas.2205326119.sapp.pdf [file pnas.2205326119.sapp.pdf]

1

## 2 **Supplementary Information for**

### 3 **Spatial patterns of climate change across the Paleocene-Eocene Thermal Maximum**

4 **Jessica E. Tierney, Jiang Zhu, Mingsong Li, Andy Ridgwell, Gregory J. Hakim, Christopher J. Poulsen, Ross D. M. Whiteford,**  
5 **James W. B. Rae, and Lee R. Kump**

6 **Jessica E. Tierney.**  
7 **E-mail: [jesst@arizona.edu](mailto:jesst@arizona.edu)**

#### 8 **This PDF file includes:**

- 9     Supplementary text
- 10    Figs. S1 to S10 (not allowed for Brief Reports)
- 11    Tables S1 to S2 (not allowed for Brief Reports)
- 12    Legends for Dataset S1 to S2
- 13    SI References

#### 14 **Other supplementary materials for this manuscript include the following:**

- 15     Datasets S1 to S2

## 16 Supporting Information Text

### 17 Supporting Materials & Methods

18 **Proxy data compilation.** The data used in this reconstruction derive primarily from the deepMIP compilation of pre-PETM and  
19 PETM proxy indicators for temperature (1). These data include the  $\delta^{18}\text{O}$  of well-preserved (“glassy”) planktic foraminifera,  
20 the Mg/Ca of foraminifera,  $\text{TEX}_{86}$ , and the terrestrial  $\text{MBT}_{5'_{Me}}$  proxy. We targeted these particular proxies because we have  
21 previously developed Bayesian forward models for each of them, which facilitates the use in the data assimilation framework  
22 (2–5). Generally speaking, we followed deepMIP guidance for assessing which proxy values fell within the pre-PETM and  
23 PETM time periods; any adjustments to this assumption are documented in the “assessment” column of the proxy data file  
24 (Dataset S1). We also incorporated additional, more recently published studies (6–12), referring to the original publications  
25 when assigning data to each target time interval.  $\delta^{18}\text{O}$  and Mg/Ca analyses conducted on single foraminifera were pre-averaged  
26 within their respective core depths before calculating prePETM and PETM averages. The Otaio Gorge  $\text{MBT}_{5'_{Me}}$  data from the  
27 lignite and marine sediment beds, respectively, were treated as separate estimates given that there is a lithological offset (12).

28 In the deepMIP compilation,  $\text{TEX}_{86}$  data with BIT index  $> 0.4$  (an indicator of terrestrial GDGT input, c.f. (13)) and  
29 methane index (MI)  $> 0.5$  (an indicator of GDGT input from methanotrophs, c.f. (14)) were excluded from the prePETM  
30 and PETM averages.  $\Delta$  Ring Index (RI) values were assessed and flagged if greater than 0.3, but data were not necessarily  
31 excluded on the basis of  $\Delta$ RI alone. We follow this guidance with a few exceptions, noting that none of these quality indices  
32 have agreed-upon universal cut-off values and the decision of what to include/exclude can be site-specific. From the Harrell  
33 Core dataset, we opted to include three late Paleocene datapoints with a MI  $< 0.5$  (in spite of BIT values of ca. 0.8) in the  
34 interest of having the prePETM represented at that site (otherwise, all prePETM data would be excluded). The average  
35  $\text{TEX}_{86}$  value of these three datapoints is 0.738, which is similar to the prePETM values at other eastern North American sites  
36 (Bass River and Wilson Lake; 0.748 and 0.700, respectively), suggesting that the data are reasonable. From the ACEX dataset,  
37 we used the updated dataset of ref. (8) and the same PETM averaging interval as deepMIP, but, again in the interest of  
38 having the prePETM represented at this site, included two late Paleocene datapoints that had BIT  $< 0.4$ , MI  $< 0.5$ , and  $\Delta$ RI  
39  $< 0.35$ . At the Fur site, given that the recent study of ref. (6) measured  $\text{TEX}_{86}$  on the same section as the older study of  
40 ref. (15), largely replicating the original result but at higher resolution, the data from ref. (15) are excluded so as to avoid  
41 duplication. From ref. (6), we included all of the late Paleocene data (which have BIT values from 0.27–0.51 but normal MI  
42 and  $\Delta$ RI values) except for four data points from the prePETM average that had more elevated BIT (0.54–0.81) and  $\Delta$ RI  $>$   
43 0.35 (labeled in red dots in Figure 5 of ref. (6)). At the Chicxulub crater drill site (M0077A) there is only one data point from  
44 the prePETM available. We included it, because in spite of a  $\Delta$ RI of 0.7 it has low BIT (0.16) and MI (0.18).

45 For the  $\delta^{18}\text{O}$  and Mg/Ca of foraminifera, we collected data measured on species thought have lived in the mixed layer, close  
46 to the ocean surface, namely *Morozovella spp.* and *Acarinina spp.*. However, we subsequently discovered that inclusion of  
47 *Acarinina spp.* in the data assimilation systematically reduced the change in global mean surface temperature (GMST) during  
48 the PETM (see further discussion below). Several previous studies have suggested that *Acarinina spp.* migrated to deeper  
49 waters during the PETM event, as its  $\delta^{18}\text{O}$  composition appears similar to that of the thermocline-dwelling *Subbotina spp.*  
50 (16–18). Our data compilation indicates that the  $\delta^{18}\text{O}$  of *Acarinina spp.* during the PETM is, on average, 0.36‰ higher (i.e.,  
51 cooler) than *Morozovella spp.* at the same sites, and likewise, that Mg/Ca values for *Acarinina spp.* are 0.31 mmol/mol lower.  
52 We therefore decided to exclude *Acarinina spp.* from our final reconstruction.

53 The assimilation uses the average proxy value for each timeslice. The standard deviation of this value and number of  
54 datapoints contributing are documented in the proxy data file (Dataset S1).

55 **Climate model simulations.** The prior climate simulations used the fully-coupled, isotope-enabled Community Earth System  
56 Model version 1.2 (iCESM 1.2) (19). iCESM simulates the transport and transformation of stable water isotopes ( $\delta^{18}\text{O}$  and  $\delta\text{D}$ )  
57 in all component models (20). All the iCESM simulations have a horizontal resolution of  $1.9^\circ \times 2.5^\circ$  (latitude  $\times$  longitude) in  
58 the atmosphere and land, and a nominal  $1^\circ$  displaced-pole Greenland grid for the ocean. The simulations with 3X, 6X, and 9X  
59 preindustrial  $\text{CO}_2$  employed boundary conditions from deepMIP (21), which include reconstructions of Eocene paleogeography,  
60 land-sea mask, and vegetation distribution (22), and preindustrial non- $\text{CO}_2$  greenhouse gas concentrations, solar constant,  
61 orbital parameters, soil properties, and natural aerosol emissions. Seawater  $\delta^{18}\text{O}$  and  $\delta\text{D}$  were initialized from constant values  
62 of  $-1\text{‰}$  and  $-8\text{‰}$ , respectively (1). The 3X, 6X, and 9X simulations were integrated for 2,000 years and are described in  
63 refs. (23, 24). In addition, we extended each of these simulations for an additional 200 years using an updated formulation  
64 of the surface virtual salinity flux (see equation 7 from (25)), which better resolves the seawater salinity near river mouths  
65 and in the semi-enclosed Eocene Arctic Ocean. The 3X and 6X simulations were further branched into three experiments  
66 (respectively) with varying orbital parameters, including a minimum eccentricity and obliquity scenario (eccentricity = 0.0,  
67 obliquity =  $22^\circ$ ), a high Northern Hemisphere seasonality scenario (eccentricity = 0.054, obliquity =  $24.5^\circ$ , perihelion during  
68 boreal summer), and a high Southern Hemisphere seasonality scenario (eccentricity = 0.054, obliquity =  $24.5^\circ$  perihelion  
69 during austral summer), following ref. (26). We also expanded the  $\text{CO}_2$  sensitivity simulations by adding runs with 10X and  
70 11X preindustrial  $\text{CO}_2$ , which were initialized from the 9X simulation and each integrated for 500 years. We note that the  
71 10X simulation has not reached quasi-equilibrium and exhibits a trend in GMST of  $0.3^\circ\text{C}$  per century during the last 200  
72 years. Also, the 11X simulation becomes unstable after year  $\sim 400$  and a GMST of  $\sim 43^\circ\text{C}$  with the top-of-atmosphere net  
73 radiation increasing with warming, indicating a “runaway greenhouse” effect in the model (Fig. S10). Although the 10X  
74 and 11X simulations are not in equilibrium, we decided to include them in the data assimilation to sample the superwarm,

low-possibility climate states. Table S2 gives a summary of these simulations and their boundary conditions; Figure S10 presents the time series of global mean surface temperature from all of these simulations.

50-year monthly and annual averages were drawn from each of these 14 simulations to use as the model prior in the data assimilation for a total of 72 prior ensemble members. Specifically, we sampled the last 600 years of the 3X, 6X, and 9X simulations (36 priors); the last 150 years of the extended versions of these experiments with a different virtual salinity flux (9 priors); the last 100 years of each orbital experiment at 3X and 6X (12 priors); the last 450 years of the 10X simulation (9 priors); and years 51-350 from the 11X simulation (6 priors, avoiding the end of the simulation that is unstable). The prior sampling strategy was designed to ensure that all of the simulations were represented in the prior while also somewhat reducing over-representation of the longest simulations (Fig. S10). Previous work has shown that offline DA results on long timescales are not sensitive to the length of the time-average (27), thus we chose 50 years, consistent with our previous approach (27). We note that even though GMST may be relatively similar between consecutive 50-yr periods from the same model experiment, spatial patterns may differ in response to internal, multi-decadal variability. In addition to the model fields needed for proxy forward modeling (sea-surface temperature (SST), sea-surface salinity (SSS),  $\delta^{18}\text{O}_{sw}$ ; see below) we also included surface air temperature (SAT; at 2m), precipitation, evaporation, the isotopes of precipitation ( $\delta^{18}\text{O}$  and  $\delta\text{D}$ ), snow thickness, and cloud cover in the model prior so that those fields were updated by the data assimilation.

**Data assimilation.** The data assimilation method is an offline, ensemble square root Kalman filter approach, following the methodology developed in refs. (27, 28) using the MATLAB code package DASH version 4.0.0, Alpha Test 5.0.6 (<https://github.com/JonKing93/DASH>). We refer the reader to these previous works for a full mathematical description. Briefly, the posterior climate state ( $X_{post}$ , the reconstruction) is computed as a linear combination of the model prior states and the information from the proxies, with a mean update equation of:

$$\bar{X}_{post} = \bar{X}_{prior} + K(y_{obs} - \bar{Y}_{est}) \quad [1]$$

$X_{prior}$  is a  $N \times M$  matrix containing the prior model states, where  $N$  contains all of the climate fields of interest (SST, SAT,  $\delta^{18}\text{O}_{sw}$ , etc) collapsed into a “state vector”, and  $M$  is the number of ensemble members (72 in this case).  $y_{obs}$  is a  $P \times 1$  vector containing the proxy data from each site at one point in time.  $Y_{est}$  is a  $P \times M$  matrix of estimated proxy values, forward-modeled from the model priors using Bayesian proxy models (2–5), for each site with a proxy and for each ensemble member. To compute these values, we used the “analog mode” of the BAYSPAR calibration for  $\text{TEX}_{86}$  with a wide tolerance of  $12^\circ\text{C}$ , and the annual, “all-species” models for both  $\delta^{18}\text{O}$  and Mg/Ca, recognizing that the foraminifera are extinct species and their seasonality of production is unknown.

Forward-modeling for  $\text{TEX}_{86}$  and  $\text{MBT}_{Me}^5$  is straightforward; only SST and SAT information from the model prior is required, respectively. The  $\delta^{18}\text{O}$  forward model requires SST and  $\delta^{18}\text{O}_{sw}$ , which are taken directly from the model prior, but also requires constraints on surface ocean pH, which has been shown to influence foraminiferal  $\delta^{18}\text{O}$  in culture studies (29) and therefore is very likely to influence  $\delta^{18}\text{O}$  excursions during the PETM (30). To accommodate the “pH effect,” a function was added to the BAYFOX forward modeling package to adjust  $\delta^{18}\text{O}$  based on the theoretical equations provided by ref. (31). pH values were drawn from the cGENIE simulation of ref. (32) for each core site, for the PETM and prePETM states, respectively.

The Mg/Ca proxy requires constraints on pH, bottom water saturation state ( $\Omega$ ), SSS, the Mg/Ca composition of seawater, and the laboratory cleaning method. SSS was drawn from the model prior and the cleaning method is provided in the source publications. The BAYMAG forward model has a built-in function to compute the Mg/Ca of seawater (4), which for the PETM time (56 Ma) is 2.2. As with  $\delta^{18}\text{O}$ , pH values were drawn from cGENIE (32), along with bottom water  $\Omega$ , using a documented estimate of paleodepth for each core site.

$y_{obs} - \bar{Y}_{est}$  is the “innovation”, the new information coming from the proxies, which is added to the prior state with a weight of  $K$ , the Kalman gain:

$$K = \text{cov}(X_{prior}, Y_{est}) \times [\text{cov}(Y_{est}, Y_{est}) + R]^{-1} \quad [2]$$

where ‘cov’ denotes the covariance. The first term  $\text{cov}(X_{prior}, Y_{est})$  describes the relationship between the prior state and the forward-modeled proxy values, and effectively “spreads” the proxy information across the fields of interest. The second term  $[\text{cov}(Y_{est}, Y_{est}) + R]^{-1}$  contains the error terms, including the covariance of the estimated proxy values ( $Y_{est}$ ) and the proxy covariance ( $R$ ). In this case,  $R$  is diagonal; i.e., the errors are assumed to be independent between proxies, following (27, 28).  $R$  is user-defined, and ideally reflects an estimate of the “true” uncertainties of the proxies in the environment. The Bayesian forward models provide a posterior value for proxy variance that represents the uncertainty associated with the global core-top regressions that underlie these models; these values can be used for  $R$ . This error estimate is conservative, and previous work applying data assimilation to Quaternary climate reconstruction found that posterior validation was improved by scaling the Bayesian-derived uncertainty by about 1/5, with slightly different factors for different proxies (27, 28). However, the climatic changes during the PETM are extreme; in the tropics, temperatures exceed the upper bounds of the modern calibration datasets, and the organisms recording the proxy values were experiencing biological stress. Thus, we opt to use values of  $R$  without any scaling. We make an exception to this for the  $\delta^{18}\text{O}$  proxy, because initial leave-one-out validation testing (see below) revealed no improvement in posterior RMSE for this proxy with  $R = 0.35$  (a standard deviation of  $0.59\%$ ), the error associated with the annual “all-species” BAYFOX model. We therefore scaled the error by a factor of 0.75 to  $R = 0.26$ , the maximum value that produced improved internal validation in the posterior. The finding that  $\delta^{18}\text{O}$  error may be smaller than the BAYFOX estimate is qualitatively consistent with ref. (28), where validation exercises indicated that  $\delta^{18}\text{O}$  was more precise. The final  $R$  variances used for each proxy (in native proxy units) were 0.0045, 0.26, 0.046, and 0.0082 for  $\text{TEX}_{86}$ ,  $\delta^{18}\text{O}$ ,

134 Mg/Ca (in log units), and  $MBT_{Me}^{5'}$ , respectively. These translate into approximate  $1\sigma$  SST uncertainties of  $5.2^\circ\text{C}$  for  $TEX_{86}$ ,  
135  $2.2^\circ\text{C}$  for  $\delta^{18}\text{O}$ ,  $3.3^\circ\text{C}$  for Mg/Ca, and  $3.5^\circ\text{C}$  for  $MBT_{Me}^{5'}$ .

136 **Validation.** Given the limited proxy network, withholding 25% of the proxy data for internal validation, as was done in refs.  
137 (27, 28), was not practical. Instead, following ref. (33), we conducted leave-one-out experiments, in which each proxy was  
138 iteratively left out of the reconstruction and then the posterior result was used to forward-model the withheld proxy. Validation  
139 was assessed by comparing the root-mean-square-error (RMSE) of the posterior prediction against the prior prediction for the  
140 withheld proxies. For all four proxy types, RMSE improved in the posterior, indicating that the posterior solution represents a  
141 better match to the proxy information than the prior mean. RMSE improvement varied between proxy type with  $MBT_{Me}^{5'}$ ,  
142  $\delta^{18}\text{O}$ , Mg/Ca, and  $TEX_{86}$  improving by 3%, 3%, 19%, and 20%, respectively.

143 External validation is more useful and rigorous assessment of the reliability of the reconstruction. For this, we used estimates  
144 of PETM and prePETM temperatures in the deepMIP compilation (1) from terrestrial pollen, leaf-based, and clumped isotope  
145 proxies that were not assimilated (34–38). The posterior PETM-DA reproduces temperatures at these sites well ( $R^2 = 0.95$ ) as  
146 shown in Fig. 2d. Notably, this validation score is higher than that of the prior mean ( $R^2 = 0.70$ , Fig. S5), indicating that  
147 the assimilation of the SST proxies resulted in a solution that is more consistent with the terrestrial proxy information. We  
148 also visually compared posterior  $P - E$  to independent qualitative hydrological indicators of the sign of change (wetter or  
149 drier) from the compilation of ref. (39) with addition of data from ref. (7) (Fig. 3a). Finally, we compared posterior  $\delta\text{D}$  of  
150 precipitation to leaf wax  $\delta\text{D}_P$  proxies compiled in ref. (39) (Fig. 3c). These proxies provide an estimate of the change in the  
151 isotopes of precipitation, but at some sites the data do not indicate a clear excursion across the PETM. Thus, we plotted the  
152 average difference for sites where the PETM change exceeded  $2\times$  the standard error range with colors that represent the size of  
153 the excursion, and for sites that did not meet this criteria, we plotted smaller white circles to indicate no significant change  
154 (Fig. 3c). The temperature,  $P - E$ , and leaf wax  $\delta\text{D}_P$  validation data may be found in Dataset S2.

155 **Sensitivity Testing.** Since the  $\delta^{18}\text{O}$  and Mg/Ca proxy data require assumptions about the change in the ocean carbonate system  
156 during the PETM (see above) we investigated the sensitivity of the posterior PETM-DA GMST to these choices (Fig. S1). Our  
157 main result uses pH estimates from the cGENIE simulation of ref. (32), which simulates a drop in pH during the PETM of 0.3  
158 units (from ca. 7.7 in the prePETM to 7.4 during the PETM). However the pH drop during the PETM could have been larger  
159 or smaller than indicated by this study. We therefore conducted DA experiments in which the pH change was increased to 0.5  
160 units and decreased to 0.1 units, respectively, to assess whether the magnitude of this change affects our results. We found  
161 that GMST was not substantially affected by this choice (Fig. S1, “ $5\Delta\text{pH}$ ” and “ $1\Delta\text{pH}$ ”). Next, we tested the sensitivity of  
162 the DA to the choice of bottom water  $\Omega$  (needed for forward modeling of Mg/Ca) by setting  $\Omega$  to a value of 5 at each site,  
163 which effectively eliminates the impact of dissolution on the proxy (4). This resulted in slight lowering of absolute values  
164 of GMST (but still largely within error of the main results) and no change in  $\Delta\text{GMST}$  (Fig. S1, “Omega5”). As discussed  
165 above, we discovered that inclusion of proxy data from *Acarinina spp.* lowers PETM GMST (but has little effect on prePETM  
166 GMST) thereby lowering  $\Delta\text{GMST}$  to  $4.4^\circ\text{C}$  (Fig. S1, “Acarinina”). This is consistent with evidence that this species occupied  
167 a deeper part of the mixed layer during the PETM (16–18) and informed our decision to only use *Morozovella spp.* in our  
168 main PETM-DA result. To further test the sensitivity of the DA to the carbonate system assumptions, we conducted an  
169 experiment where values of ocean pH and  $\Omega$  were held at modern values (drawn from the Global Ocean Data Analysis Project  
170 (GLODAP) version 2 (40), using the `omgph.m` function in BAYMAG). This choice lowers absolute GMST and  $\Delta\text{GMST}$ , but not  
171 by much because the use of higher pH and lower  $\Omega$  partly counteract each other (Fig. S1, “ModCarb”). We note that this is  
172 not realistic scenario, given that atmospheric  $\text{CO}_2$  concentrations were certainly much higher than present during the late  
173 Paleocene/early Eocene.

174 Finally, we tested the sensitivity of the DA to assumptions surrounding the “pH effect” on foraminiferal  $\delta^{18}\text{O}$  by conducting  
175 a DA experiment with the pH correction set to the low sensitivity exhibited by the extant planktic species *Orbulina universa*  
176 (29) (“LowpHSens” in Fig. S1) and by removing the pH effect entirely (“nopHCorr” in Fig. S1). In both cases absolute  
177 GMST is lower, especially for the PETM, since the drop in pH has less effect on  $\delta^{18}\text{O}$  (Fig. S1). This results in a reduction  
178 of  $\Delta\text{GMST}$  (Fig. S1). In our view, eliminating the pH correction entirely is not justified as culture studies of planktic and  
179 benthic foraminiferal species all show some sensitivity to changing pH (29, 41, 42). The reduced sensitivity of *Orbulina*  
180 *universa* (ca. 0.27‰ per pH unit) could conceivably be related to the fact that it is symbiont-bearing, with the photosynthetic  
181 symbionts acting to locally increase pH around the site of calcification (43). However, ref. (29) conducted experiments with  
182 *Orbulina* under both high light and dark conditions and there was no detectable difference in shell  $\delta^{18}\text{O}$ , seemingly ruling out a  
183 symbiont-related control. *Morozovella spp.* were also symbiont-bearing (44) which raises the possibility that they could have  
184 behaved like *Orbulina*, but given that, to the best of our knowledge, there are no additional published culture studies of other  
185 species of symbiont-bearing planktic foraminifera, and that ecology of *Morozovella spp.* is not precisely known, we prefer to  
186 use the thermodynamical pH effect correction (31) (ca. 1‰ per pH unit, between a pH of 7–8) in our main PETM-DA. This  
187 thermodynamical expectation also adequately explains the magnitude of the pH effect seen in cultures of the non-symbiont  
188 bearing *G. bulloides* (29) and symbiont-bearing benthic foraminifera (41, 42).

189 **Climate Sensitivity Calculations.** Following the framework of (45), we calculated climate sensitivity during the PETM relative  
190 to the prePETM, assuming  $\text{CO}_2$  change is the sole forcing agent:

$$191 \quad ECS_{PETM} = \Delta\text{GMST} / \text{CO}_2 \text{ doublings} \quad [3]$$

192 where

$$193 \text{CO}_2 \text{ doublings} = \log_2(\text{PETM}_{\text{CO}_2}) - \log_2(\text{prePETM}_{\text{CO}_2}) \quad [4]$$

194 An ensemble estimate of  $\Delta\text{GMST}$  is derived from the PETM-DA posterior. prePETM and PETM  $\text{CO}_2$  concentrations  
195 were re-computed from the two available marine boron isotope ( $\delta^{11}\text{B}$ ) records that cover the event in temporal detail, from  
196 ODP 1209 (46) and DSDP 401 (32). Besides these boron isotope data, two other high-resolution records of  $\text{CO}_2$  across the  
197 PETM exist. The reconstruction of (47) is based on B/Ca and  $\delta^{11}\text{B}$  and thus is not independent from the  $\delta^{11}\text{B}$  estimate we  
198 derive here; it also requires a double use of pH, hence the authors did not recommend its use for  $\text{CO}_2$  reconstruction. The  
199 reconstruction of ref. (48) is based on carbon isotope measurements on terrestrial bulk organic matter, and thus is independent  
200 from marine proxies. However, this reconstruction method is relative—it requires an assumption to be made about starting  
201 concentrations of  $\text{CO}_2$ . ref. (48) assume that prePETM  $\text{CO}_2$  was 338 ppm, which is not physically realistic considering the  
202 prePETM GMST we derive here (28.5°C). Moreover, use of higher plant-derived carbon isotopes to infer  $\text{CO}_2$  is controversial,  
203 given evidence that plant carbon isotope fractionation also responds to aridity and that plants adapt to  $\text{CO}_2$  on long geological  
204 timescales (49). Hence, we limit our analysis to the boron isotope data.

205 The  $\delta^{11}\text{B}$  of planktic foraminifera is a proxy for the pH of surface seawater, which, in regions where dissolved  $\text{CO}_2$  is in  
206 equilibrium with the atmosphere, is directly related to atmospheric  $\text{CO}_2$  concentration. The computation of pH from  $\delta^{11}\text{B}$   
207 requires constraints on the  $\delta^{11}\text{B}$  composition of seawater ( $\delta^{11}\text{B}_{sw}$ ), the equilibrium constant of boric acid ( $K_B$ ), and the  
208 equilibrium fractionation between boric acid and borate. For the latter, we use the value of 27.2‰ from ref. (50). For  $\delta^{11}\text{B}_{sw}$ ,  
209 we use the estimate of 38.5‰ from ref. (51) with an uncertainty of 0.2‰ ( $1\sigma$ ).  $K_B$  is a function of seawater state (temperature,  
210 salinity, pressure). Pressure is assumed to be 0 db; SST and SSS for each core site are drawn from the ensemble posterior of  
211 the PETM-DA. Computation of the carbonate system equilibrium constants also requires estimates of  $[\text{Ca}^{2+}]$  and  $[\text{Mg}^{2+}]$ ;  
212 for these we use the estimate of  $[\text{Mg}^{2+}]$  from ref. (52) for 56 Ma and compute  $[\text{Ca}^{2+}]$  assuming a Mg/Ca<sub>sw</sub> ratio of 2.2, for  
213 consistency with the value used in the BAYMAG forward model for Mg/Ca.

214 The calculation of  $\text{CO}_2$  from pH depends on SST and also requires an additional constraint on one other parameter of the  
215 ocean carbonate system. For SST, we use the posterior output from the PETM-DA at each core location, which is consistent  
216 with the estimate for GMST used for the climate sensitivity calculation. Moreover, computing SST from the raw proxy  
217 data at each site poses a circularity problem, since the Mg/Ca and  $\delta^{18}\text{O}$  proxies require assumptions about surface ocean  
218 pH. The PETM-DA is constrained not only by Mg/Ca and  $\delta^{18}\text{O}$ , but also by organic proxies that do not have a carbonate  
219 system dependency (TEX<sub>86</sub> and MBT<sub>Me</sub><sup>5'</sup>), and is additionally subject to the constraints of the SST field covariance from the  
220 model prior. It is thus more independent from carbonate system assumptions (though not completely independent, since pH  
221 assumptions factor into forward modeling) and more robust than site-specific estimates.

222 Common choices for the second carbonate system parameter include alkalinity (*Alk*) (i.e., ref. (53)) and surface ocean  
223 saturation state ( $\Omega$ ) (i.e., ref. (51)). For the prePETM, we use  $\Omega$ , and randomly sample from a wide uniform distribution  
224 of physically plausible values (between 5–8 (54)). These values are then used to compute  $\text{CO}_2$  and *Alk* for the prePETM  
225 state. For the PETM, we leverage the carbonate chemistry solutions of the cGENIE simulations presented in ref. (32). These  
226 simulations were initialized with prePETM carbonate chemistry following refs. (55, 56), and then used both boron and carbon  
227 isotope constraints to fit the carbon emissions in the model to match the proxy-observed magnitude of the pH and carbon  
228 isotope excursion during the PETM. Although these results are partly fitted to the  $\delta^{11}\text{B}$ -derived pH from Site 401 (which  
229 is used here to compute the change in  $\text{CO}_2$ ) we use only the *relative* change in *Alk* simulated by ref. (32) which minimizes  
230 circularity. *Alk* is also a conservative property and thus not dependent on PETM ocean temperature. The simulated increase  
231 in *Alk* is 300  $\mu\text{mol kg}^{-1}$ ; this value is added to the prePETM *Alk* and then used to compute  $\text{CO}_2$  during the PETM.

232 This approach allows both *Alk* and  $\Omega$  to change during the PETM, consistent with proxy evidence for undersaturation  
233 (57, 58) and carbon modeling results (32, 56, 59). However, as a sensitivity test, we also consider two end-member scenarios  
234 in which either *Alk* or  $\Omega$  is held constant between the prePETM and PETM. Both scenarios compute prePETM *Alk* and  
235  $\text{CO}_2$  using  $\Omega$ , as described above. In the “Constant *Alk*” scenario, the prePETM *Alk* is then left unchanged and used to  
236 calculate PETM  $\text{CO}_2$ . This effectively assumes that carbonate and silicate weathering on land is too slow to contribute to a  
237 significant rise in *Alk* during the body of the PETM, which given the estimated time span of the PETM body (70–80 kyr;  
238 (60)) is not realistic. In the “Constant  $\Omega$ ” scenario, we simply use the same  $\Omega$  values for the prePETM and PETM. This  
239 scenario is the opposite of “Constant *Alk*”; it assumes that weathering rapidly results in higher *Alk*, completely mitigating a  
240 drop in saturation state. As with the “Constant *Alk*” scenario, this is also not realistic given widespread evidence for ocean  
241 undersaturation and carbonate dissolution (57, 58). However, ref. (47) argue that this solution is plausible if the marine sites  
242 from which the  $\delta^{11}\text{B}$  records derive are missing the peak of the event (and therefore the drop in  $\Omega$ ). Sedimentary loss has been  
243 reported at both of the sites with  $\delta^{11}\text{B}$  data (DSDP 401 and ODP 1209), the former due to incomplete rotary drilling recovery  
244 (61) and the latter due to syndepositional dissolution and burndown (62), so this remains a possibility (albeit perhaps unlikely).

245 The “Constant *Alk*” scenario results in higher ECS (7.9°C; 6.9–9.3°C, 95% CI) (Fig. S6; Table S1) whereas “Constant  $\Omega$ ”  
246 results in the lower ECS (5.6°C; 4.8–6.7°C, 95% CI) (Fig. S9; Table S1). These results provide conservative upper and lower  
247 limits on what ECS could have been—i.e., it is unlikely to be either below 5 or above 9—and therefore support our conclusion  
248 in the main text that PETM ECS is higher than the IPCC AR6 90% CI range of 2–5°C.

249 Recognizing that the value of  $\delta^{11}\text{B}_{sw}$  is not yet securely known for the PETM time period, we also conducted sensitivity  
250 tests with  $\delta^{11}\text{B}_{sw}$  set to a lower value (38‰) and a higher value (39‰). These experiments show that the choice of  $\delta^{11}\text{B}_{sw}$   
251 mainly impacts the absolute values of  $\text{CO}_2$ , with a lower  $\delta^{11}\text{B}_{sw}$  leading to lower  $\text{CO}_2$  and vice versa. The  $\delta^{11}\text{B}_{sw}$  value has  
252 less of impact on  $\text{CO}_2$  doublings and ECS, with the solutions for the latter only changing by 0.2–0.3°C (Table S1).

253 Since the calculation of climate sensitivity relies on the *change* in CO<sub>2</sub> relative to the prePETM base concentration (CO<sub>2</sub>  
254 doublings, Eq. 3), some of the uncertainties associated with the estimation of absolute values of CO<sub>2</sub> can be reduced by  
255 calculating the prePETM and PETM carbonate systems as a “pair”. For example, given the long residence time of boron in  
256 seawater,  $\delta^{11}\text{B}_{sw}$  can be assumed to not change through the event. Likewise, although the sampling of the carbonate system  
257 parameters is done separately for each site, the draws are carried through between the prePETM and PETM states, such  
258 that computation of  $\Delta\text{CO}_2$  eliminates the absolute uncertainty in these values. In this way, the uncertainty surrounding the  
259 calculation of CO<sub>2</sub> doublings is smaller than the uncertainties surrounding the absolute CO<sub>2</sub> concentrations estimated for each  
260 time period (Table S1, Fig. S9), as previously shown by ref. (63).

261 All calculations were conducted with 5,000 Monte Carlo simulations to fully sample the multiple sources of uncertainty  
262 ( $\delta^{11}\text{B}_{sw}$ , GMST, SST and SSS, and the second carbonate system parameter), following the methods in ref. (64). The code for  
263 these calculations is available on GitHub here: [https://github.com/St-Andrews-Isotope-Geochemistry/PETM\\_deltaCO2](https://github.com/St-Andrews-Isotope-Geochemistry/PETM_deltaCO2).

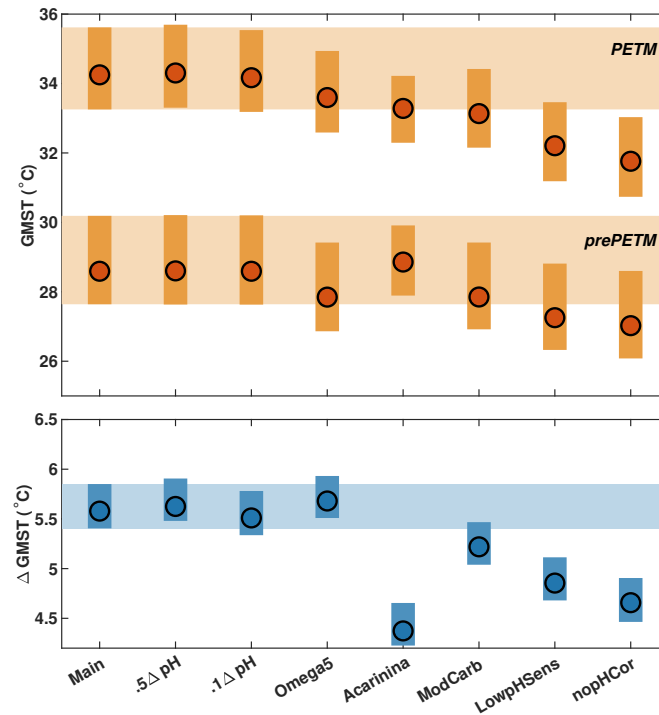

**Fig. S1.** Sensitivity testing for the PETM-DA in which different assumptions are made about the carbonate system for forward modeling of foraminiferal  $\delta^{18}\text{O}$  and Mg/Ca. “Main” presents the results shown in the main text, which use carbonate system parameters drawn from cGENIE (32). “.5ΔpH” increases the pH drop during the PETM to 0.5; “.1ΔpH” decreases it to 0.1. “Omega5” sets the bottom water water saturation state ( $\Omega$ ) in the Mg/Ca forward model to 5 for all sites, effectively eliminating the influence of  $\Omega$  on the proxy. “Acarinina” includes Mg/Ca and  $\delta^{18}\text{O}$  data from *Acarinina* spp. (which are excluded from the Main result). “ModCarb” uses modern carbonate system parameters for Mg/Ca and  $\delta^{18}\text{O}$  (drawn using the `omgph.m` function in BAYMAG). “LowpHSens” assumes that the  $\delta^{18}\text{O}$  sensitivity to pH is smaller than predicted by thermodynamics, following experimental results with *Orbulina universa*. “nopHCor” assumes  $\delta^{18}\text{O}$  is not sensitive to ocean pH. Top panel shows differences in absolute values of GMST for the PETM and prePETM respectively. Bottom panel shows differences in the change in GMST ( $\Delta\text{GMST}$ ). For reference, light orange bands indicate Main values for PETM and prePETM GMST, light blue band indicates Main values for  $\Delta\text{GMST}$ . In all cases, error bounds represent the 95% confidence interval, dots show the median.

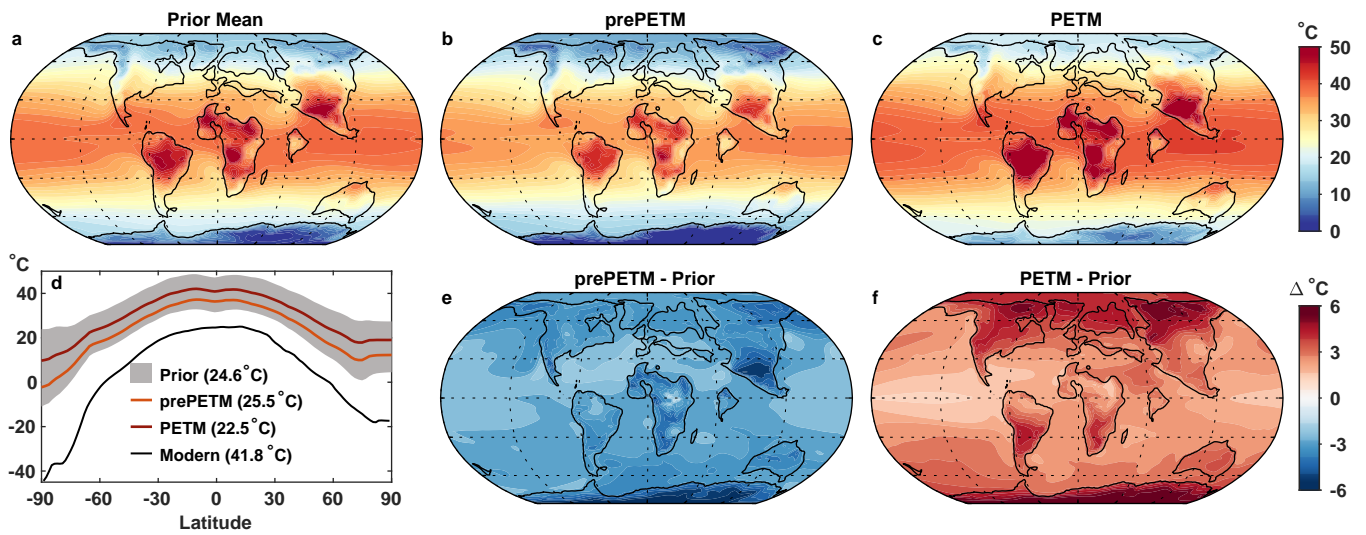

**Fig. S2.** Comparisons between the model prior and the prePETM and PETM DA posterior means for mean annual surface air temperature. a) Model prior mean annual SAT. b) Posterior mean annual SAT for the prePETM. c) Posterior mean annual SAT for the PETM. d) Zonal mean temperature for the full prior (in gray) vs. posterior means for the prePETM (orange) and PETM (red). Modern zonal mean SAT shown for reference (based on 2m air temperature from the ERA 20th Century Reanalysis (65)). Values in parentheses represent the meridional SAT gradient, calculated as average SAT between 30°S–30°N minus average SAT between 60–90°N and S. e) Difference plot between the prePETM - prior mean SAT. f) Difference plot between the PETM - prior mean SAT.



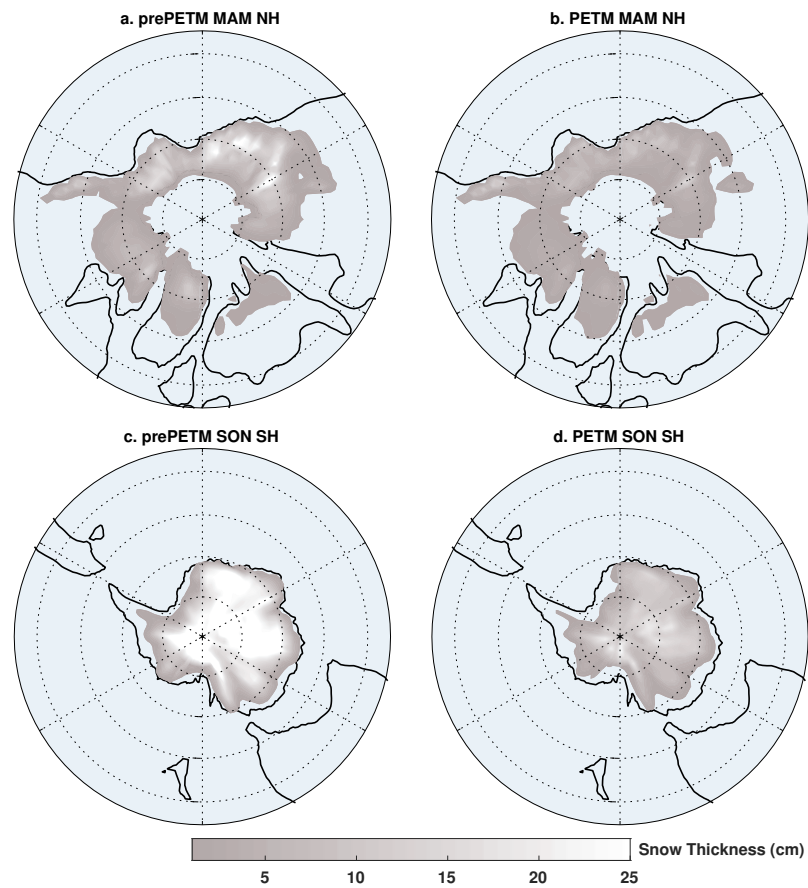

**Fig. S3.** Spring (MAM for the Northern Hemisphere, SON for the Southern Hemisphere) snow thickness from the PETM-DA, for the Northern Hemisphere (a and b) and the Southern Hemisphere (c and d) and prePETM (a and c) and PETM (b and d) time periods, respectively.

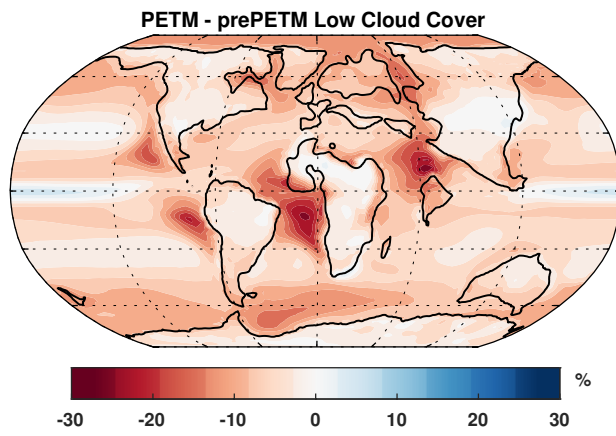

**Fig. S4.** Change in low cloud cover (%) in the PETM-DA, between the PETM and pre-PETM.

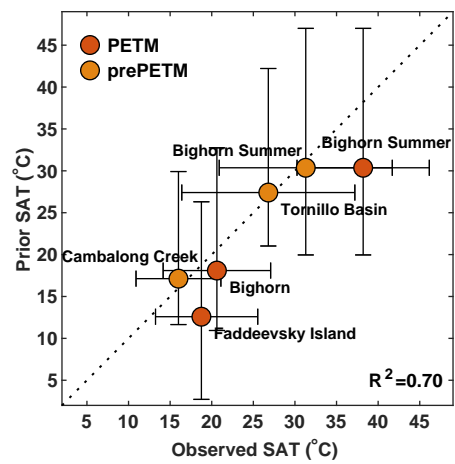

Fig. S5. Validation of the model prior against independent terrestrial temperature proxies (for comparison with Figure 2d).

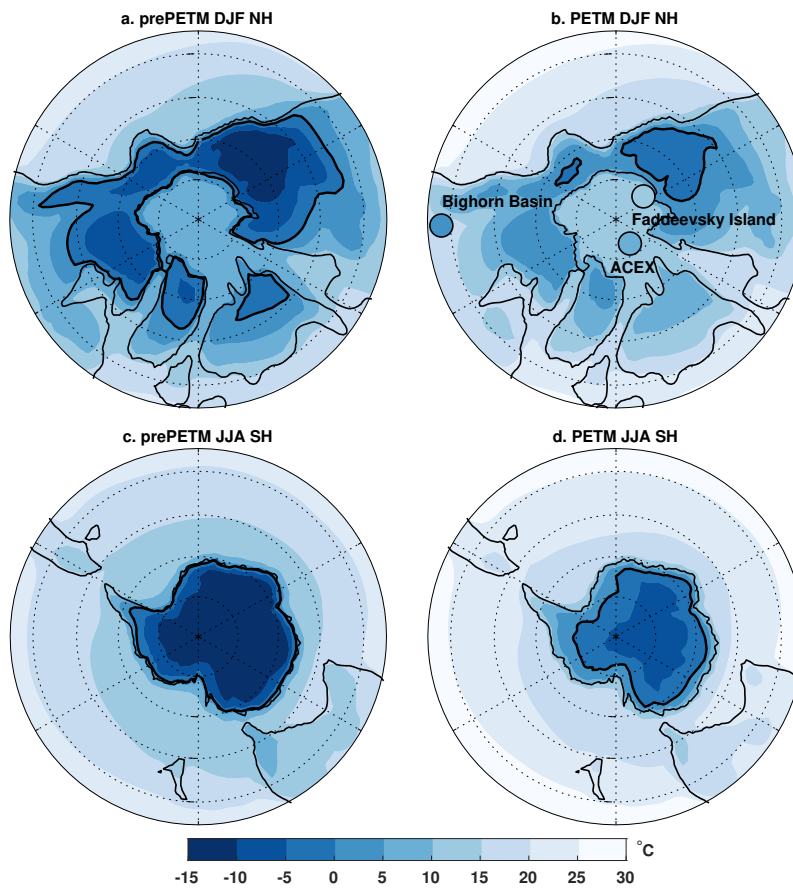

**Fig. S6.** Winter surface air temperatures (DJF for the Northern Hemisphere, JJA for the Southern Hemisphere) from the PETM-DA for the Northern Hemisphere (a and b) and the Southern Hemisphere (c and d) and prePETM (a and c) and PETM (b and d) time periods, respectively. Dots in panel b) show winter temperature estimates during the PETM from the Bighorn basin (35), Faddeevsky Island (34), and the ACEX core (66). Thick black lines indicate the 0°C contour.

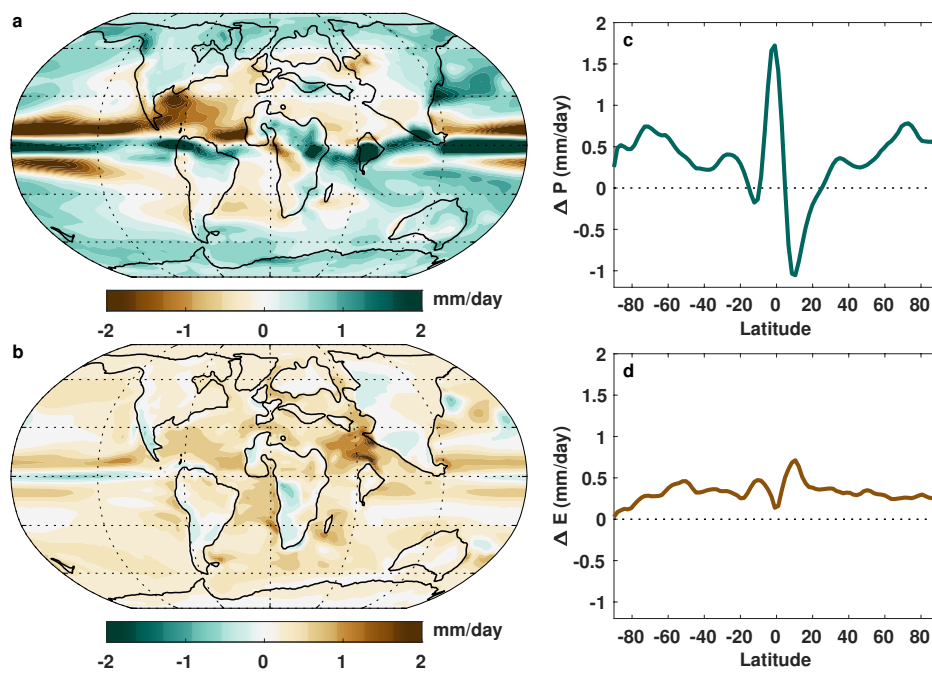

**Fig. S7.** Relative contribution of precipitation ( $P$ ) and evaporation ( $E$ ) to  $P - E$  change during the PETM. a) mean annual change in  $P$  (PETM - prePETM) b) mean annual change in  $E$  (PETM - prePETM) c) zonal mean annual change in  $P$  d) zonal mean annual change in  $E$ .

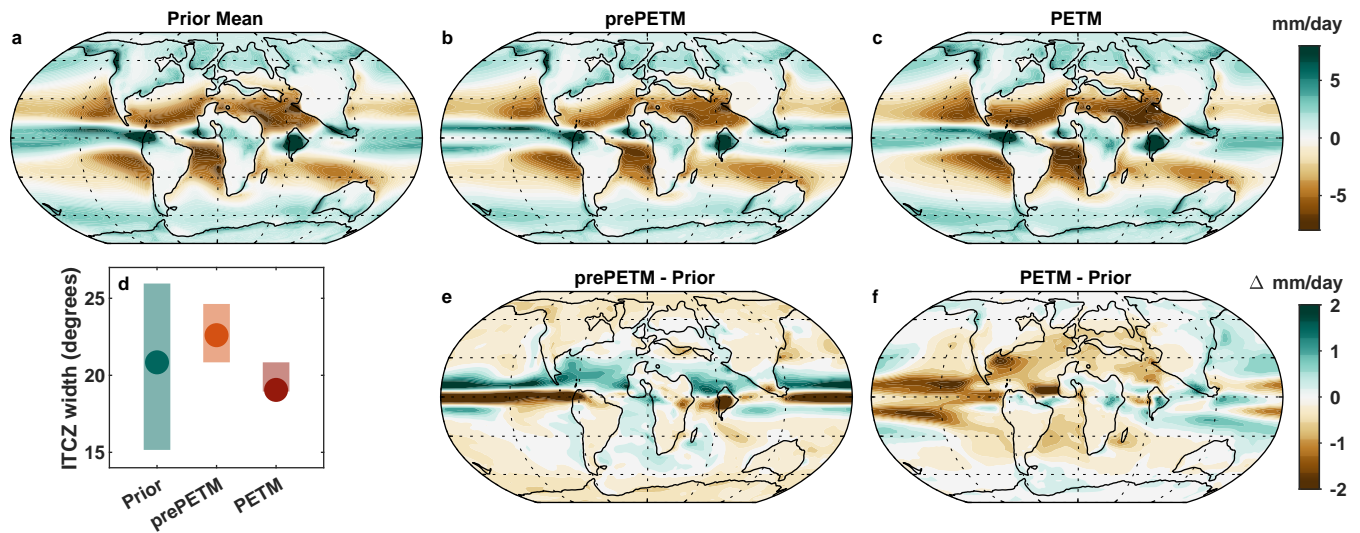

**Fig. S8.** Comparisons between the model prior and the prePETM and PETM DA posterior means for precipitation - evaporation ( $P - E$ ). a) Model prior mean annual  $P - E$ . b) Posterior mean annual  $P - E$  for the prePETM. c) Posterior mean annual  $P - E$  for the PETM. d) ITCZ width for the prior, prePETM, and PETM, calculated as the latitude degrees between 30°S and 30°N where  $P - E > 0$ . Dots represent the mean, error bars show the 95% confidence interval. e) Difference plot between the prePETM - prior mean  $P - E$ . f) Difference plot between the PETM - prior mean  $P - E$ .

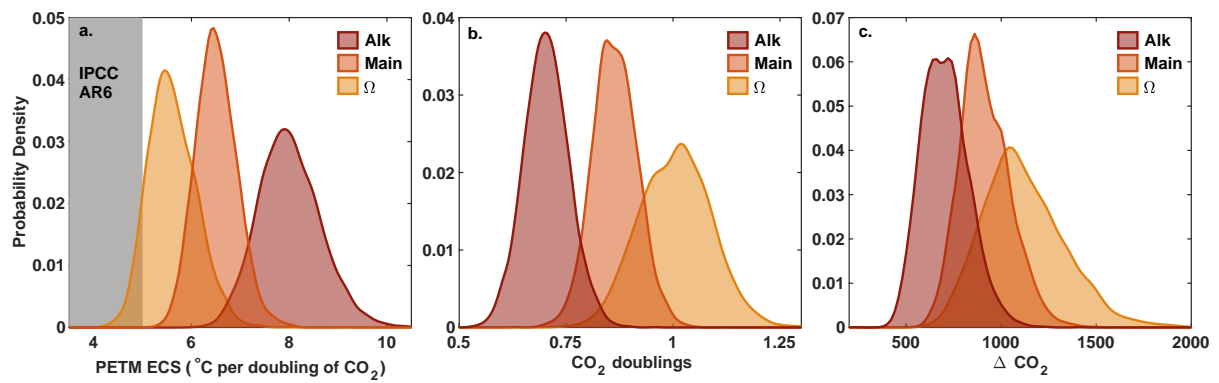

**Fig. S9.** Equilibrium climate sensitivity (ECS) for the PETM (a), calculated  $\text{CO}_2$  doublings (b) and the change in  $\text{CO}_2$  (c; ppm) between the PETM and prePETM, under three carbonate system scenarios. “Main” corresponds to the scenario shown in the main text. “Alk” and “ $\Omega$ ” correspond to the “Constant *Alk*” and “Constant  $\Omega$ ” end-member scenarios. The IPCC AR6 90% CI range for ECS is shown as a gray bar in panel a (67).

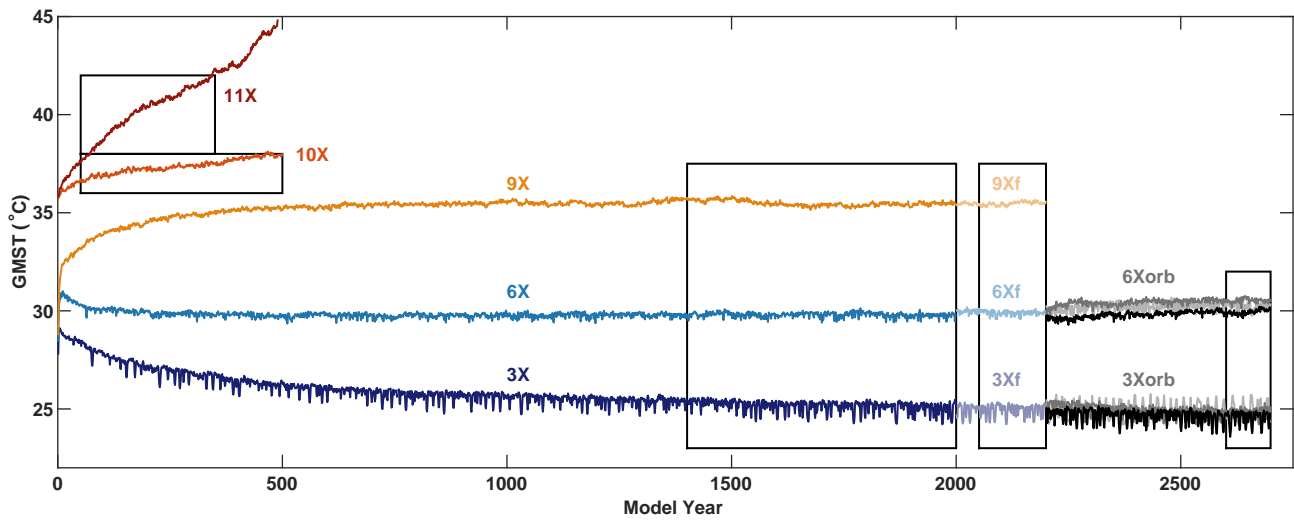

**Fig. S10.** Time series of global mean surface temperature (GMST) from all of the model experiments used as priors for the PETM-DA (Table S2). Boxes enclose the time periods that were sampled to generate the model priors.  $NX$  denotes  $N$  times preindustrial  $CO_2$ ;  $NXf$  denotes extended runs with a modified surface virtual salinity flux;  $NXorb$  denotes runs with different orbital configurations. Note that, although they are plotted as starting at Year 0, the 10X and 11X experiments were branched from the long 9X experiment. The 11X experiment becomes unstable after ca. year 400 and a GMST of 43°C hence was not sampled during that interval. See the Supplementary text for details of these simulations.



**Table S1. Median and 95% CI values (in parantheses) for prePETM and PETM CO<sub>2</sub> concentrations (ppm), the change in CO<sub>2</sub> ( $\Delta$ CO<sub>2</sub>), the change in *Alk* ( $\Delta$ *Alk*; averaged between Sites 1209 and 401), the change in  $\Omega$  ( $\Delta\Omega$ ; averaged between Sites 1209 and 401), CO<sub>2</sub> Doublings, and equilibrium climate sensitivity (ECS) under different carbonate system scenarios. \* indicates prescribed values.**

| Scenario                                | prePETM CO <sub>2</sub> | PETM CO <sub>2</sub> | $\Delta$ CO <sub>2</sub> | $\Delta$ Alk  | $\Delta\Omega$     | CO <sub>2</sub> Doublings | ECS           |
|-----------------------------------------|-------------------------|----------------------|--------------------------|---------------|--------------------|---------------------------|---------------|
| Main                                    | 1120 (850–1460)         | 2020 (1550–2630)     | 900 (690–1200)           | 300*          | –0.62 (–1.13–0.19) | 0.86 (0.76–0.97)          | 6.5 (5.7–7.4) |
| Constant <i>Alk</i>                     | 1120 (850–1460)         | 1820 (1360–2410)     | 610 (380–940)            | 0*            | –1.22 (–1.68–0.82) | 0.70 (0.60–0.81)          | 8.0 (6.9–9.3) |
| Constant $\Omega$                       | 1110 (850–1460)         | 2220 (1650–3010)     | 1090 (760–1590)          | 700 (500–970) | 0*                 | 1.01 (0.85–1.17)          | 5.6 (4.8–6.7) |
| $\delta^{11}\text{B}_{sw} = 38\text{‰}$ | 840 (650–1090)          | 1500 (1180–1900)     | 660 (510–850)            | 300*          | –0.33 (–0.79–0.07) | 0.84 (0.74–0.94)          | 6.7 (5.9–7.7) |
| $\delta^{11}\text{B}_{sw} = 39\text{‰}$ | 1520 (1150–2020)        | 2850 (2170–3790)     | 1330 (970–1820)          | 300*          | –0.96 (–1.54–0.46) | 0.91 (0.80–1.03)          | 6.2 (5.4–7.1) |

**Table S2. Summary of the model simulations used to generate priors for the PETM-DA. Note that all simulations employed boundary conditions from deepMIP (21), including Eocene paleogeography, land-sea mask, and vegetation distribution (22), and preindustrial non-CO<sub>2</sub> greenhouse gas concentrations, solar constant, soil properties, and natural aerosol emissions. Orbital parameters used in the simulations are listed, including the eccentricity ( $e$ ), obliquity ( $o$ ), and precession (in longitude of the perihelion,  $\omega$ ; for example,  $\omega = 270^\circ$  means that perihelion occurs at the Northern Hemisphere solstice). See the “Supplementary text” for details of these simulations.**

| Experiment | CO <sub>2</sub> (ppm) | Orbital Parameters                              | Virtual Salinity Flux | Length (yr) | # of priors | Citation   |
|------------|-----------------------|-------------------------------------------------|-----------------------|-------------|-------------|------------|
| 3X         | 854                   | preindustrial                                   | standard              | 2000        | 12          | (23, 24)   |
| 3Xf        | 854                   | preindustrial                                   | adjusted              | 200         | 3           | This study |
| 3Xorbmin   | 854                   | $e = 0; o = 22^\circ$                           | adjusted              | 500         | 2           | This study |
| 3XorbmaxN  | 854                   | $e = 0.054; o = 24.5^\circ; \omega = 270^\circ$ | adjusted              | 500         | 2           | This study |
| 3XorbmaxS  | 854                   | $e = 0.054; o = 24.5^\circ; \omega = 90^\circ$  | adjusted              | 500         | 2           | This study |
| 6X         | 1708                  | preindustrial                                   | standard              | 2000        | 12          | (23, 24)   |
| 6Xf        | 1708                  | preindustrial                                   | adjusted              | 200         | 3           | This study |
| 6Xorbmin   | 1708                  | $e = 0; o = 22^\circ$                           | adjusted              | 500         | 2           | This study |
| 6XorbmaxN  | 1708                  | $e = 0.054; o = 24.5^\circ; \omega = 270^\circ$ | adjusted              | 500         | 2           | This study |
| 6XorbmaxS  | 1708                  | $e = 0.054; o = 24.5^\circ; \omega = 90^\circ$  | adjusted              | 500         | 2           | This study |
| 9X         | 2562                  | preindustrial                                   | standard              | 2000        | 12          | (23, 24)   |
| 9Xf        | 2562                  | preindustrial                                   | adjusted              | 200         | 3           | This study |
| 10X        | 2847                  | preindustrial                                   | adjusted              | 500         | 9           | This study |
| 11X        | 3132                  | preindustrial                                   | adjusted              | 500         | 6           | This study |

264 **SI Dataset S1 (DatasetS1.csv)**

265 Paleoclimate proxy data used in the PETM-DA, including metadata (site name, modern location, paleo-location, source  
266 references).

267 **SI Dataset S2 (DatasetS2.xlsx)**

268 Independent proxy data used to validate the PETM-DA, including the terrestrial temperature data shown in Figure 2d, the  
269 hydrological proxy data shown in Figure 3a, and the leaf wax  $\delta D_F$  data shown in Figure 3c.

270 **References**

- 271 1. CJ Hollis, et al., The DeepMIP contribution to PMIP4: methodologies for selection, compilation and analysis of latest  
272 Paleocene and early Eocene climate proxy data, incorporating version 0.1 of the DeepMIP database. *Geosci. Model. Dev.*  
273 **12**, 3149–3206 (2019).
- 274 2. JE Tierney, MP Tingley, A Bayesian, spatially-varying calibration model for the TEX<sub>86</sub> proxy. *Geochimica et Cosmochimica*  
275 *Acta* **127**, 83–106 (2014).
- 276 3. SB Malevich, L Vetter, JE Tierney, Global Core Top Calibration of  $\delta^{18}\text{O}$  in Planktic Foraminifera to Sea Surface  
277 Temperature. *Paleoceanogr. Paleoclimatology* **34**, 1292–1315 (2019).
- 278 4. JE Tierney, SB Malevich, W Gray, L Vetter, K Thirumalai, Bayesian calibration of the Mg/Ca paleothermometer in  
279 planktic foraminifera. *Paleoceanogr. Paleoclimatology* **34**, 2005–2030 (2019).
- 280 5. ED Crampton-Flood, JE Tierney, F Peterse, FM Kirkels, JS Sinninghe Damsté, BayMBT: A Bayesian calibration model  
281 for branched glycerol dialkyl glycerol tetraethers in soils and peats. *Geochimica et Cosmochimica Acta* **268**, 142–159  
282 (2020).
- 283 6. EW Stokke, MT Jones, JE Tierney, HH Svensen, JH Whiteside, Temperature changes across the Paleocene-Eocene  
284 Thermal Maximum—a new high-resolution TEX<sub>86</sub> temperature record from the Eastern North Sea Basin. *Earth Planet.*  
285 *Sci. Lett.* **544**, 116388 (2020).
- 286 7. V Smith, et al., Life and death in the Chicxulub impact crater: a record of the Paleocene–Eocene Thermal Maximum.  
287 *Clim. Past* **16**, 1889–1899 (2020).
- 288 8. A Sluijs, et al., Late Paleocene–early Eocene Arctic Ocean sea surface temperatures: reassessing biomarker paleothermom-  
289 etry at Lomonosov Ridge. *Clim. Past* **16**, 2381–2400 (2020).
- 290 9. JS Barnet, et al., Coupled evolution of temperature and carbonate chemistry during the Paleocene–Eocene; new trace  
291 element records from the low latitude Indian Ocean. *Earth Planet. Sci. Lett.* **545**, 116414 (2020).
- 292 10. R Kozdon, et al., Enhanced poleward flux of atmospheric moisture to the Weddell Sea region (ODP site 690) during the  
293 Paleocene-Eocene thermal maximum. *Paleoceanogr. Paleoclimatology* **35**, e2019PA003811 (2020).
- 294 11. E Huurdeman, et al., Rapid expansion of meso-megathermal rain forests into the southern high latitudes at the onset of  
295 the Paleocene-Eocene Thermal Maximum. *Geology* **49**, 40–44 (2021).
- 296 12. GN Inglis, et al., Terrestrial methane cycle perturbations during the onset of the Paleocene-Eocene Thermal Maximum.  
297 *Geology* **49**, 520–524 (2021).
- 298 13. EC Hopmans, et al., A novel proxy for terrestrial organic matter in sediments based on branched and isoprenoid tetraether  
299 lipids. *Earth Planet. Sci. Lett.* **224**, 107–116 (2004).
- 300 14. YG Zhang, et al., Methane index: A tetraether archaeal lipid biomarker indicator for detecting the instability of marine  
301 gas hydrates. *Earth Planet. Sci. Lett.* **307**, 525–534 (2011).
- 302 15. PL Schoon, C Heilmann-Clausen, BP Schultz, JSS Damste, S Schouten, Warming and environmental changes in the  
303 eastern North Sea Basin during the Palaeocene–Eocene Thermal Maximum as revealed by biomarker lipids. *Org. Geochem.*  
304 **78**, 79–88 (2015).
- 305 16. A Bornemann, et al., Persistent environmental change after the Paleocene–Eocene Thermal Maximum in the eastern  
306 North Atlantic. *Earth Planet. Sci. Lett.* **394**, 70–81 (2014).
- 307 17. M Makarova, et al., Hydrographic and ecologic implications of foraminiferal stable isotopic response across the US  
308 mid-Atlantic continental shelf during the Paleocene-Eocene Thermal Maximum. *Paleoceanography* **32**, 56–73 (2017).
- 309 18. W Si, MP Aubry, Vital effects and ecologic adaptation of photosymbiont-bearing planktonic foraminifera during the  
310 Paleocene-Eocene thermal maximum, implications for paleoclimate. *Paleoceanogr. Paleoclimatology* **33**, 112–125 (2018).
- 311 19. JW Hurrell, et al., The community Earth system model: a framework for collaborative research. *Bull. Am. Meteorol. Soc.*  
312 **94**, 1339–1360 (2013).
- 313 20. E Brady, et al., The connected isotopic water cycle in the Community Earth System Model version 1. *J. Adv. Model.*  
314 *Earth Syst.* **11**, 2547–2566 (2019).
- 315 21. DJ Lunt, et al., The DeepMIP contribution to PMIP4: experimental design for model simulations of the EECO, PETM,  
316 and pre-PETM (version 1.0). *Geosci. Model. Dev.* **10**, 889–901 (2017).
- 317 22. N Herold, et al., A suite of early Eocene (~ 55 Ma) climate model boundary conditions. *Geosci. Model. Dev.* **7**, 2077–2090  
318 (2014).
- 319 23. J Zhu, CJ Poulsen, JE Tierney, Simulation of Eocene extreme warmth and high climate sensitivity through cloud feedbacks.  
320 *Sci. Adv.* **5**, eaax1874 (2019).

- 321 24. J Zhu, et al., Simulation of early Eocene water isotopes using an Earth system model and its implication for past climate  
322 reconstruction. *Earth Planet. Sci. Lett.* **537**, 116164 (2020).
- 323 25. Yh Tseng, FO Bryan, MM Whitney, Impacts of the representation of riverine freshwater input in the community Earth  
324 system model. *Ocean. Model.* **105**, 71–86 (2016).
- 325 26. DJ Lunt, et al., A model for orbital pacing of methane hydrate destabilization during the Palaeogene. *Nat. Geosci.* **4**,  
326 775–778 (2011).
- 327 27. JE Tierney, et al., Glacial cooling and climate sensitivity revisited. *Nature* **584**, 569–573 (2020).
- 328 28. MB Osman, et al., Globally resolved surface temperatures since the Last Glacial Maximum. *Nature* **599**, 239–244 (2021).
- 329 29. HJ Spero, J Bijma, DW Lea, BE Bemis, Effect of seawater carbonate concentration on foraminiferal carbon and oxygen  
330 isotopes. *Nature* **390**, 497–500 (1997).
- 331 30. J Uchikawa, RE Zeebe, Examining possible effects of seawater pH decline on foraminiferal stable isotopes during the  
332 Paleocene-Eocene Thermal Maximum. *Paleoceanography* **25** (2010).
- 333 31. R Zeebe, An expression for the overall oxygen isotope fractionation between the sum of dissolved inorganic carbon and  
334 water. *Geochem. Geophys. Geosystems* **8** (2007).
- 335 32. M Gutjahr, et al., Very large release of mostly volcanic carbon during the Palaeocene–Eocene Thermal Maximum. *Nature*  
336 **548**, 573–577 (2017).
- 337 33. JM King, et al., A data assimilation approach to last millennium temperature field reconstruction using a limited  
338 high-sensitivity proxy network. *J. Clim.* **34**, 7091–7111 (2021).
- 339 34. G Suan, et al., Subtropical climate conditions and mangrove growth in Arctic Siberia during the early Eocene. *Geology*  
340 **45**, 539–542 (2017).
- 341 35. KE Snell, et al., Hot summers in the Bighorn Basin during the early Paleogene. *Geology* **41**, 55–58 (2013).
- 342 36. DJ Peppe, et al., Sensitivity of leaf size and shape to climate: global patterns and paleoclimatic applications. *New*  
343 *phytologist* **190**, 724–739 (2011).
- 344 37. JR Kelson, et al., Warm terrestrial subtropics during the Paleocene and Eocene: Carbonate clumped isotope ( $\Delta 47$ )  
345 evidence from the Tornillo Basin, Texas (USA). *Paleoceanogr. Paleoclimatology* **33**, 1230–1249 (2018).
- 346 38. DR Greenwood, PT Moss, AI Rowett, AJ Vadala, RL Keefe, Plant communities and climate change in southeastern  
347 Australia during the early Paleogene. *Special Pap. Geol. Soc. Am.* **369**, 365–380 (2003).
- 348 39. MJ Carmichael, et al., Hydrological and associated biogeochemical consequences of rapid global warming during the  
349 Paleocene-Eocene Thermal Maximum. *Glob. Planet. Chang.* **157**, 114–138 (2017).
- 350 40. SK Lauvset, et al., A new global interior ocean mapped climatology: The 1 × 1 GLODAP version 2. *Earth Syst. Sci. Data*  
351 **8**, 325–340 (2016).
- 352 41. C Rollion-Bard, J Erez, T Zilberman, Intra-shell oxygen isotope ratios in the benthic foraminifera genus *Amphistegina*  
353 and the influence of seawater carbonate chemistry and temperature on this ratio. *Geochimica et Cosmochimica Acta* **72**,  
354 6006–6014 (2008).
- 355 42. LL Robbins, P Knorr, J Wynn, P Hallock, P Harries, Interpreting the role of pH on stable isotopes in large benthic  
356 foraminifera. *ICES J. Mar. Sci.* **74**, 955–964 (2017).
- 357 43. J Bijma, H Spero, D Lea, Reassessing foraminiferal stable isotope geochemistry: Impact of the oceanic carbonate system  
358 (experimental results) in *Use of proxies in paleoceanography: Examples from the South Atlantic*, eds. G Fischer, G Weber.  
359 (Springer), pp. 489–512 (1999).
- 360 44. T Aze, et al., A phylogeny of Cenozoic macroperforate planktonic foraminifera from fossil data. *Biol. Rev.* **86**, 900–927  
361 (2011).
- 362 45. G Shaffer, M Huber, R Rondanelli, JO Pepke Pedersen, Deep time evidence for climate sensitivity increase with warming.  
363 *Geophys. Res. Lett.* **43**, 6538–6545 (2016).
- 364 46. DE Penman, B Hönisch, RE Zeebe, E Thomas, JC Zachos, Rapid and sustained surface ocean acidification during the  
365 Paleocene-Eocene Thermal Maximum. *Paleoceanography* **29**, 357–369 (2014).
- 366 47. LL Haynes, B Hönisch, The seawater carbon inventory at the Paleocene–Eocene Thermal Maximum. *Proc. Natl. Acad.*  
367 *Sci.* **117**, 24088–24095 (2020).
- 368 48. Y Cui, BA Schubert, Towards determination of the source and magnitude of atmospheric pCO<sub>2</sub> change across the early  
369 Paleogene hyperthermals. *Glob. Planet. Chang.* **170**, 120–125 (2018).
- 370 49. K Schlanser, et al., On geologic timescales, plant carbon isotope fractionation responds to precipitation similarly to modern  
371 plants and has a small negative correlation with pCO<sub>2</sub>. *Geochimica et Cosmochimica Acta* **270**, 264–281 (2020).
- 372 50. K Klochko, AJ Kaufman, W Yao, RH Byrne, JA Tossell, Experimental measurement of boron isotope fractionation in  
373 seawater. *Earth Planet. Sci. Lett.* **248**, 276–285 (2006).
- 374 51. E Anagnostou, et al., Changing atmospheric CO<sub>2</sub> concentration was the primary driver of early Cenozoic climate. *Nature*  
375 **533**, 380–384 (2016).
- 376 52. RE Zeebe, T Tyrrell, History of carbonate ion concentration over the last 100 million years II: Revised calculations and  
377 new data. *Geochimica et Cosmochimica Acta* **257**, 373–392 (2019).
- 378 53. MA Martínez-Botí, et al., Plio-Pleistocene climate sensitivity evaluated using high-resolution CO<sub>2</sub> records. *Nature* **518**,  
379 49–54 (2015).
- 380 54. A Ridgwell, A Mid Mesozoic Revolution in the regulation of ocean chemistry. *Mar. Geol.* **217**, 339–357 (2005).
- 381 55. K Panchuk, A Ridgwell, L Kump, Sedimentary response to Paleocene-Eocene Thermal Maximum carbon release: A

- 382 model-data comparison. *Geology* **36**, 315–318 (2008).
- 383 56. A Ridgwell, DN Schmidt, Past constraints on the vulnerability of marine calcifiers to massive carbon dioxide release. *Nat.*  
384 *Geosci.* **3**, 196–200 (2010).
- 385 57. JC Zachos, et al., Rapid acidification of the ocean during the Paleocene-Eocene thermal maximum. *Science* **308**, 1611–1615  
386 (2005).
- 387 58. TJ Bralower, et al., Evidence for shelf acidification during the onset of the Paleocene-Eocene thermal maximum.  
388 *Paleoceanogr. Paleoclimatology* **33**, 1408–1426 (2018).
- 389 59. Y Cui, et al., Slow release of fossil carbon during the Palaeocene–Eocene Thermal Maximum. *Nat. Geosci.* **4**, 481–485  
390 (2011).
- 391 60. U Röhl, T Westerhold, TJ Bralower, JC Zachos, On the duration of the Paleocene-Eocene thermal maximum (PETM).  
392 *Geochem. Geophys. Geosystems* **8** (2007).
- 393 61. TL Babila, et al., Capturing the global signature of surface ocean acidification during the Palaeocene–Eocene Thermal  
394 Maximum. *Philos. Transactions Royal Soc. A: Math. Phys. Eng. Sci.* **376**, 20170072 (2018).
- 395 62. TJ Bralower, et al., Impact of dissolution on the sedimentary record of the Paleocene–Eocene thermal maximum. *Earth*  
396 *Planet. Sci. Lett.* **401**, 70–82 (2014).
- 397 63. GL Foster, JW Rae, Reconstructing ocean pH with boron isotopes in foraminifera. *Annu. Rev. Earth Planet. Sci.* **44**,  
398 207–237 (2016).
- 399 64. JW Rae, et al., Atmospheric CO<sub>2</sub> over the past 66 million years from marine archives. *Annu. Rev. Earth Planet. Sci.* **49**,  
400 609–641 (2021).
- 401 65. P Poli, et al., ERA-20C: An atmospheric reanalysis of the twentieth century. *J. Clim.* **29**, 4083–4097 (2016).
- 402 66. DA Willard, et al., Arctic vegetation, temperature, and hydrology during Early Eocene transient global warming events.  
403 *Glob. Planet. Chang.* **178**, 139–152 (2019).
- 404 67. P Forster, et al., The Earth’s energy budget, climate feedbacks, and climate sensitivity in *Climate Change 2021: The*  
405 *Physical Science Basis. Working Group I contribution to the Sixth Assessment Report of the Intergovernmental Panel on*  
406 *Climate Change*, eds. V Masson-Delmotte, et al. (Cambridge University Press, Cambridge, United Kingdom), (2021).
